# Supplementary material for: A New Tool for Nutrition App Quality Evaluation (AQEL): Development, Validation, and Reliability Testing
Source: PubMed Central journal article supplement (PMC5681720; doi:10.2196/mhealth.7441), 2017-10-27
Supplement: mhealth_v5i10e163_app2.pdf [file mhealth_v5i10e163_app2.pdf]

# App Quality Eval (AQEL)

*\*For access to the online survey, information on how to score AQEL, as well as permission to use the questions, please contact Kristen DiFilippo at [kdifilip@illinois.edu](mailto:kdifilip@illinois.edu).\**

## App Information

Q1 The first questions are to clearly identify which app is being evaluated.

---

Q2 What is the name of the app you are evaluating?

---

Q3 What is the version number of the app (if the app has never been updated, please put Version 1)? You will find this when downloading the app.

Version (example: 1.2) \_\_\_\_\_

Not sure

---

Q4 Is this app the full app or a lite version of the app? You will find this when downloading the app, or on the app icon.

Full

Lite

Unsure/Not applicable

---

Q5 The most recent revision date (or date of creation if no revisions) is:

- Within the last month
  - Within the last 6 months
  - Within the last year
  - Longer than one year
  - Date generated by application (does not apply to content)
  - Not applicable
- 

Q6 What "store" did you use to download the app?

- Google Play
  - iTunes
  - App Store
  - Other (please provide name of store)
- 

End of Block

---

## AQEL: User information

**Q7 This next set of questions is to gather user information about the app. Spend 10-15 minutes familiarizing yourself with and trying out all parts/features of the app. After using the app, please answer the rest of the questions. You may refer back to the app as you answer the questions.**

---

Q8 Please select the device(s) you used to evaluate the app (please check all that apply)

iPad

iPhone

Kindle

Android

Other, please list \_\_\_\_\_

---

End of Block

---

## AQEL: App Purpose

Q9 Do you feel that the app has a clear purpose?

Yes

Maybe

No

---

Q10 Does the app title accurately describe the content of the app?

- Title describes the content very accurately
- Title mostly describes the content accurately
- Title is somewhat related to the content
- Title is hardly related to the content
- Title does not relate to the content in any way

End of Block

---

## **AQEL: Behavior change, knowledge and skill development**

Q11 In your opinion does the app try to...

|                     | Yes                   | No                    |
|---------------------|-----------------------|-----------------------|
| increase knowledge? | <input type="radio"/> | <input type="radio"/> |
| develop a skill?    | <input type="radio"/> | <input type="radio"/> |
| change behavior?    | <input type="radio"/> | <input type="radio"/> |

---

Q12 Do you think the app will...

|                                     | Definitely yes | Probably yes | Maybe | Probably not | Definitely not |
|-------------------------------------|----------------|--------------|-------|--------------|----------------|
| increase the user's knowledge?      | 0              | 0            | 0     | 0            | 0              |
| lead to the development of a skill? | 0              | 0            | 0     | 0            | 0              |
| lead to behavior change?            | 0              | 0            | 0     | 0            | 0              |

---

Q13 When considering activities within the app, please answer the following:

|                                                          | Very likely | Likely | Somewhat likely | Unlikely | Very unlikely |
|----------------------------------------------------------|-------------|--------|-----------------|----------|---------------|
| Will the activities help the user to increase knowledge? | 0           | 0      | 0               | 0        | 0             |
| Will the activities help the user to change behavior?    | 0           | 0      | 0               | 0        | 0             |
| Will the activities help the user to develop a skill?    | 0           | 0      | 0               | 0        | 0             |

---

Q14 Please answer the following questions:

|                                                         | Definitely yes | Probably yes | Maybe | Probably not | Definitely not |
|---------------------------------------------------------|----------------|--------------|-------|--------------|----------------|
| Would your friends use this app?                        | 0              | 0            | 0     | 0            | 0              |
| Do you intend to use this app in the future?            | 0              | 0            | 0     | 0            | 0              |
| Will you do something differently after using this app? | 0              | 0            | 0     | 0            | 0              |
| Will you try to do something new after using this app?  | 0              | 0            | 0     | 0            | 0              |

---

Q15 How well does the app provide:

|                                  | Very well | Well | Adequately | Poorly | Very poorly |
|----------------------------------|-----------|------|------------|--------|-------------|
| Information?                     | 0         | 0    | 0          | 0      | 0           |
| Feedback on progress?            | 0         | 0    | 0          | 0      | 0           |
| Timely feedback whenever needed? | 0         | 0    | 0          | 0      | 0           |

---

Q16 Is feedback provided when the user participates in an activity in the app?

Yes

No

Not applicable

---

End of Block

---

## AQEL: App functionality

Q17 Please rate the following:

|                                                                     | Very good             | Good                  | Ok                    | Bad                   | Very bad              |
|---------------------------------------------------------------------|-----------------------|-----------------------|-----------------------|-----------------------|-----------------------|
| Speed of loading the app                                            | <input type="radio"/> | <input type="radio"/> | <input type="radio"/> | <input type="radio"/> | <input type="radio"/> |
| The user's ability to "retrace their steps" if they need to         | <input type="radio"/> | <input type="radio"/> | <input type="radio"/> | <input type="radio"/> | <input type="radio"/> |
| Transitions from page to page                                       | <input type="radio"/> | <input type="radio"/> | <input type="radio"/> | <input type="radio"/> | <input type="radio"/> |
| Function of any animations (quick & functional - slow & fragmented) | <input type="radio"/> | <input type="radio"/> | <input type="radio"/> | <input type="radio"/> | <input type="radio"/> |
| Design of menus and icons                                           | <input type="radio"/> | <input type="radio"/> | <input type="radio"/> | <input type="radio"/> | <input type="radio"/> |
| Ease of navigation to the app's various features                    | <input type="radio"/> | <input type="radio"/> | <input type="radio"/> | <input type="radio"/> | <input type="radio"/> |

---

End of Block

---

## AQEL: What app is for/Who app is for

Q18 This set of questions refers to what the app is for, and who it is for.

---

Q33 What age group is the app targeting? Please select all that apply

Children

Teenageers

Adults

General Audience (all of the above)

Other (Please list) \_\_\_\_\_

---

Q19 Is the app appropriate for children in terms of

|                     | Yes                   | Maybe                 | No                    |
|---------------------|-----------------------|-----------------------|-----------------------|
| Maturity level      | <input type="radio"/> | <input type="radio"/> | <input type="radio"/> |
| Nutrition needs     | <input type="radio"/> | <input type="radio"/> | <input type="radio"/> |
| Cognitive abilities | <input type="radio"/> | <input type="radio"/> | <input type="radio"/> |
| Color scheme        | <input type="radio"/> | <input type="radio"/> | <input type="radio"/> |
| Readability         | <input type="radio"/> | <input type="radio"/> | <input type="radio"/> |

---



Q37 Is the app appropriate for teenagers in terms of

|                     | Yes                   | Maybe                 | No                    |
|---------------------|-----------------------|-----------------------|-----------------------|
| Maturity level      | <input type="radio"/> | <input type="radio"/> | <input type="radio"/> |
| Nutrition needs     | <input type="radio"/> | <input type="radio"/> | <input type="radio"/> |
| Cognitive abilities | <input type="radio"/> | <input type="radio"/> | <input type="radio"/> |
| Color scheme        | <input type="radio"/> | <input type="radio"/> | <input type="radio"/> |
| Readability         | <input type="radio"/> | <input type="radio"/> | <input type="radio"/> |

---

Q38 Is the app appropriate for adults in terms of

|                     | Yes                   | Maybe                 | No                    |
|---------------------|-----------------------|-----------------------|-----------------------|
| Maturity level      | <input type="radio"/> | <input type="radio"/> | <input type="radio"/> |
| Nutrition needs     | <input type="radio"/> | <input type="radio"/> | <input type="radio"/> |
| Cognitive abilities | <input type="radio"/> | <input type="radio"/> | <input type="radio"/> |
| Color scheme        | <input type="radio"/> | <input type="radio"/> | <input type="radio"/> |
| Readability         | <input type="radio"/> | <input type="radio"/> | <input type="radio"/> |

---

Q39 Is the app appropriate for a general audience in terms of

|                     | Yes                   | Maybe                 | No                    |
|---------------------|-----------------------|-----------------------|-----------------------|
| Maturity level      | <input type="radio"/> | <input type="radio"/> | <input type="radio"/> |
| Nutrition needs     | <input type="radio"/> | <input type="radio"/> | <input type="radio"/> |
| Cognitive abilities | <input type="radio"/> | <input type="radio"/> | <input type="radio"/> |
| Color scheme        | <input type="radio"/> | <input type="radio"/> | <input type="radio"/> |
| Readability         | <input type="radio"/> | <input type="radio"/> | <input type="radio"/> |

---

Q40 Is the app appropriate for the other age group you selected in terms of

|                     | Yes                   | Maybe                 | No                    |
|---------------------|-----------------------|-----------------------|-----------------------|
| Maturity level      | <input type="radio"/> | <input type="radio"/> | <input type="radio"/> |
| Nutrition needs     | <input type="radio"/> | <input type="radio"/> | <input type="radio"/> |
| Cognitive abilities | <input type="radio"/> | <input type="radio"/> | <input type="radio"/> |
| Color scheme        | <input type="radio"/> | <input type="radio"/> | <input type="radio"/> |
| Readability         | <input type="radio"/> | <input type="radio"/> | <input type="radio"/> |

---

Q34 Who is the target audience of the app? Please select all that apply

- People seeking help for a medical condition such as diabetes, heart disease, eating disorders, or other medical conditions. (please list which condition the app is for, or list the other medical condition) \_\_\_\_\_
- People with specific nutrition concerns such as food allergies, sports nutrition, or other nutrition concerns. (please list which nutrition concern the app is for, or list the other nutrition concern) \_\_\_\_\_
- People who are shopping for food
- People seeking recipes/meal ideas
- People seeking guidance for restaurant eating
- People seeking weight loss support
- People seeking nutrition education (including nutrition education games)
- Other, (please list target audience)  
\_\_\_\_\_

Q20 When considering people seeking help for a medical condition

|                                                                                   | Yes | Maybe | No |
|-----------------------------------------------------------------------------------|-----|-------|----|
| Is the app appropriate?                                                           | 0   | 0     | 0  |
| Does the app cover the topic comprehensively?                                     | 0   | 0     | 0  |
| Does the app cover the medical condition as well as including related topics?     | 0   | 0     | 0  |
| Is the level of detail provided adequate for this population's educational needs? | 0   | 0     | 0  |

---

Q41 When considering people with specific nutrition concerns

|                                                                                   | Yes | Maybe | No |
|-----------------------------------------------------------------------------------|-----|-------|----|
| Is the app appropriate?                                                           | 0   | 0     | 0  |
| Does the app cover the topic comprehensively?                                     | 0   | 0     | 0  |
| Does the app cover the medical condition as well as including related topics?     | 0   | 0     | 0  |
| Is the level of detail provided adequate for this population's educational needs? | 0   | 0     | 0  |

---

Q42 When considering people who are shopping for food

|                                                                                   | Yes | Maybe | No |
|-----------------------------------------------------------------------------------|-----|-------|----|
| Is the app appropriate?                                                           | 0   | 0     | 0  |
| Does the app cover the topic comprehensively?                                     | 0   | 0     | 0  |
| Does the app cover the medical condition as well as including related topics?     | 0   | 0     | 0  |
| Is the level of detail provided adequate for this population's educational needs? | 0   | 0     | 0  |

---

Q43 When considering people seeking recipes/meal ideas

|                                                                                   | Yes                   | Maybe                 | No                    |
|-----------------------------------------------------------------------------------|-----------------------|-----------------------|-----------------------|
| Is the app appropriate?                                                           | <input type="radio"/> | <input type="radio"/> | <input type="radio"/> |
| Does the app cover the topic comprehensively?                                     | <input type="radio"/> | <input type="radio"/> | <input type="radio"/> |
| Does the app cover the medical condition as well as including related topics?     | <input type="radio"/> | <input type="radio"/> | <input type="radio"/> |
| Is the level of detail provided adequate for this population's educational needs? | <input type="radio"/> | <input type="radio"/> | <input type="radio"/> |

Q44 When considering people seeking guidance for restaurant eating

|                                                                                   | Yes                   | Maybe                 | No                    |
|-----------------------------------------------------------------------------------|-----------------------|-----------------------|-----------------------|
| Is the app appropriate?                                                           | <input type="radio"/> | <input type="radio"/> | <input type="radio"/> |
| Does the app cover the topic comprehensively?                                     | <input type="radio"/> | <input type="radio"/> | <input type="radio"/> |
| Does the app cover the medical condition as well as including related topics?     | <input type="radio"/> | <input type="radio"/> | <input type="radio"/> |
| Is the level of detail provided adequate for this population's educational needs? | <input type="radio"/> | <input type="radio"/> | <input type="radio"/> |

Q45 When considering people seeking weight loss support

|                                                                                   | Yes                   | Maybe                 | No                    |
|-----------------------------------------------------------------------------------|-----------------------|-----------------------|-----------------------|
| Is the app appropriate?                                                           | <input type="radio"/> | <input type="radio"/> | <input type="radio"/> |
| Does the app cover the topic comprehensively?                                     | <input type="radio"/> | <input type="radio"/> | <input type="radio"/> |
| Does the app cover the medical condition as well as including related topics?     | <input type="radio"/> | <input type="radio"/> | <input type="radio"/> |
| Is the level of detail provided adequate for this population's educational needs? | <input type="radio"/> | <input type="radio"/> | <input type="radio"/> |

Q46 When considering people seeking nutrition education

|                                                                                   | Yes                   | Maybe                 | No                    |
|-----------------------------------------------------------------------------------|-----------------------|-----------------------|-----------------------|
| Is the app appropriate?                                                           | <input type="radio"/> | <input type="radio"/> | <input type="radio"/> |
| Does the app cover the topic comprehensively?                                     | <input type="radio"/> | <input type="radio"/> | <input type="radio"/> |
| Does the app cover the medical condition as well as including related topics?     | <input type="radio"/> | <input type="radio"/> | <input type="radio"/> |
| Is the level of detail provided adequate for this population's educational needs? | <input type="radio"/> | <input type="radio"/> | <input type="radio"/> |

Q47 When considering the "other" target audience that you listed

|                                                                                   | Yes                   | Maybe                 | No                    |
|-----------------------------------------------------------------------------------|-----------------------|-----------------------|-----------------------|
| Is the app appropriate?                                                           | <input type="radio"/> | <input type="radio"/> | <input type="radio"/> |
| Does the app cover the topic comprehensively?                                     | <input type="radio"/> | <input type="radio"/> | <input type="radio"/> |
| Does the app cover the medical condition as well as including related topics?     | <input type="radio"/> | <input type="radio"/> | <input type="radio"/> |
| Is the level of detail provided adequate for this population's educational needs? | <input type="radio"/> | <input type="radio"/> | <input type="radio"/> |
